# Supplementary material for: Positive self-reconstruction in an FeNiMo phosphide electrocatalyst for enhanced overall water splitting
Source: Royal Society of Chemistry journal article supplement (doi:10.1039/d1se01541a), 2021-01-01
Supplement: d1se01541a1.pdf [file d1se01541a1.pdf]

# **Positive self-reconstruction in FeNiMo phosphide electrocatalyst for enhanced overall water splitting**

Yi Wei, Cheol-Hwan Shin, Gyan-Barimah Caleb, Emmanuel Batsa Tetteh, Gisang Park, Jong-Sung Yu\*.

Department of Energy Science and Engineering, Daegu Gyeongbuk Institute of Science and Technology (DGIST), 333 Techno Jungang Daero, Hyeonpung-Myeon, Dalseong-Gun, Daegu 42988, Republic of Korea.

\*Corresponding author: [jsyu@dgist.ac.kr](mailto:jsyu@dgist.ac.kr)

## Experimental

### Materials preparation

Before preparation, a piece of NF was soaked into 0.5 M HCl for 5 min to remove the surface impurity layer and then cleaned with DI water and acetone for several times. Firstly, 0.5 mmol nickel chloride hexahydrate ( $\text{NiCl}_2 \cdot 6\text{H}_2\text{O}$ ), 0.5 mmol iron chloride hexahydrate ( $\text{FeCl}_3 \cdot 6\text{H}_2\text{O}$ ), and 0.5 mmol sodium molybdate dihydrate ( $\text{Na}_2\text{MoO}_4 \cdot 6\text{H}_2\text{O}$ ) were dissolved into 10 mL DI water under a vigorous magnetic stirring. Then, the cleaned Ni foam was kept into the suspension and treated under ultrasonication for 3 min. Next, the immersed NF was taken out and dried at 70 °C for 5 h, before thermal phosphidation of the dried NF under argon gas at 350 °C for 1 h to form FeNiMoP sample. In details, 1.0 g sodium hypophosphite monohydrate as phosphorus source was put upstream while the dried nickel foam was placed downstream. Then, the sample was collected after cooled down to room temperature. The same method was employed for the preparation of NiMoP, FeMoP, and FeNiP except with the absence of  $\text{FeCl}_3 \cdot 6\text{H}_2\text{O}$ ,  $\text{NiCl}_2 \cdot 6\text{H}_2\text{O}$  and  $\text{Na}_2\text{MoO}_4 \cdot 6\text{H}_2\text{O}$ , respectively. All the catalyst loading was maintained at 1.0 mg cm<sup>-2</sup>.

The IrO<sub>2</sub>/NF sample was prepared as follows: 40 mg of IrO<sub>2</sub> was mixed with 800 μL water, 175 μL isopropanol, and 25 μL Nafion (5%) in a 5 mL glass vial, and then under sonication treatment for 2 h to form a brown slurry. And then, the surface cleaned NF was dipped in the slurry and then taken out and dried at 70 °C for 5 h (Catalyst loading was around 1 mg cm<sup>-2</sup>). The cathodic electrode (Pt/C)/NF was prepared in a similar way to the IrO<sub>2</sub>/NF. In short, 5 mg commercial Pt/C (20% purchased from TANAKA company) mixed with 800 μL water, 175 μL isopropanol, and 25 μL Nafion in a 5 mL glass vial followed by ultrasonication for 2 h to get a black slurry. Then 10 μL of as-prepared ink dropped on a cleaned NF (5 mm × 5 mm), and then dried in an oven at 70 °C for 2 h. This process was repeated 4 times, making sure the catalyst loading was at 1 mg cm<sup>-2</sup>.

### Characterization

X-ray diffraction (XRD) was measured with a Rigaku Smartlab diffractometer with Cu-Kα (0.15406 nm). X-ray photoelectron spectroscopy (XPS) was operated on an AXIS-NOVA (Kratos). The scanning electron microscopy (SEM) was measured using a Hitachi S-4700 microscope. The transmission electron microscope (TEM), and scanning TEM (STEM), as well as energy dispersive X-ray spectroscopy (EDS) profile and elemental mapping were

conducted on Hitachi HF-3300. Raman spectroscopy was obtained on the Nicolet Almega XR Raman microscope under an excitation of 532 nm laser. The in-situ Raman spectra experiment were conducted with a potentiostat (Biologic VMP3), using a homemade electrolytic cell with a quartz glass as the cover to protect the objective. Pt wire, Ag/AgCl<sub>(Sat. KCl)</sub>, and FeNiMoP/NF were employed as counter electrode, reference electrolyte, and working electrode, respectively. The plane of the working electrode was perpendicular to the incident laser.

### **Electrochemical measurements**

The electrochemical characterizations were measured by a standard three-electrode system in N<sub>2</sub> saturated 1.0 M KOH on a potentiostat (Biologic VMP3). The Ag/AgCl<sub>(Sat. KCl)</sub>, Platinum wire and the as-prepared catalysts loaded on NF were used as the reference electrode, counter electrode, and working electrode, respectively. The cyclic voltammetry (CV) curves were obtained by applying a scan rate of 50 mV s<sup>-1</sup>. The LSV polarization curves were obtained with a scan rate of 5 mV s<sup>-1</sup> after CV test for 10 times. The electrochemical impedance spectroscopy (EIS) measurements were applied from the frequency of 100 kHz to 0.1 Hz. The chronopotentiometry was conducted at 10 mA cm<sup>-2</sup> in the 1.0 M KOH solution. The double-layer capacitance (C<sub>dl</sub>) values were evaluated by performing CV measurements at the scan rates from 20 mV s<sup>-1</sup> to 100 mV s<sup>-1</sup> in a potentials range from 1.024 V to 1.124 V vs RHE. All electrode potentials in this work were converted into the reversible hydrogen electrode (RHE) using the following equation:  $E_{\text{RHE}} = E_{\text{Ag|AgCl}} + 0.197 \text{ V} + 0.059\text{pH}$ . 85% IR drop was compensated through the positive feedback model.

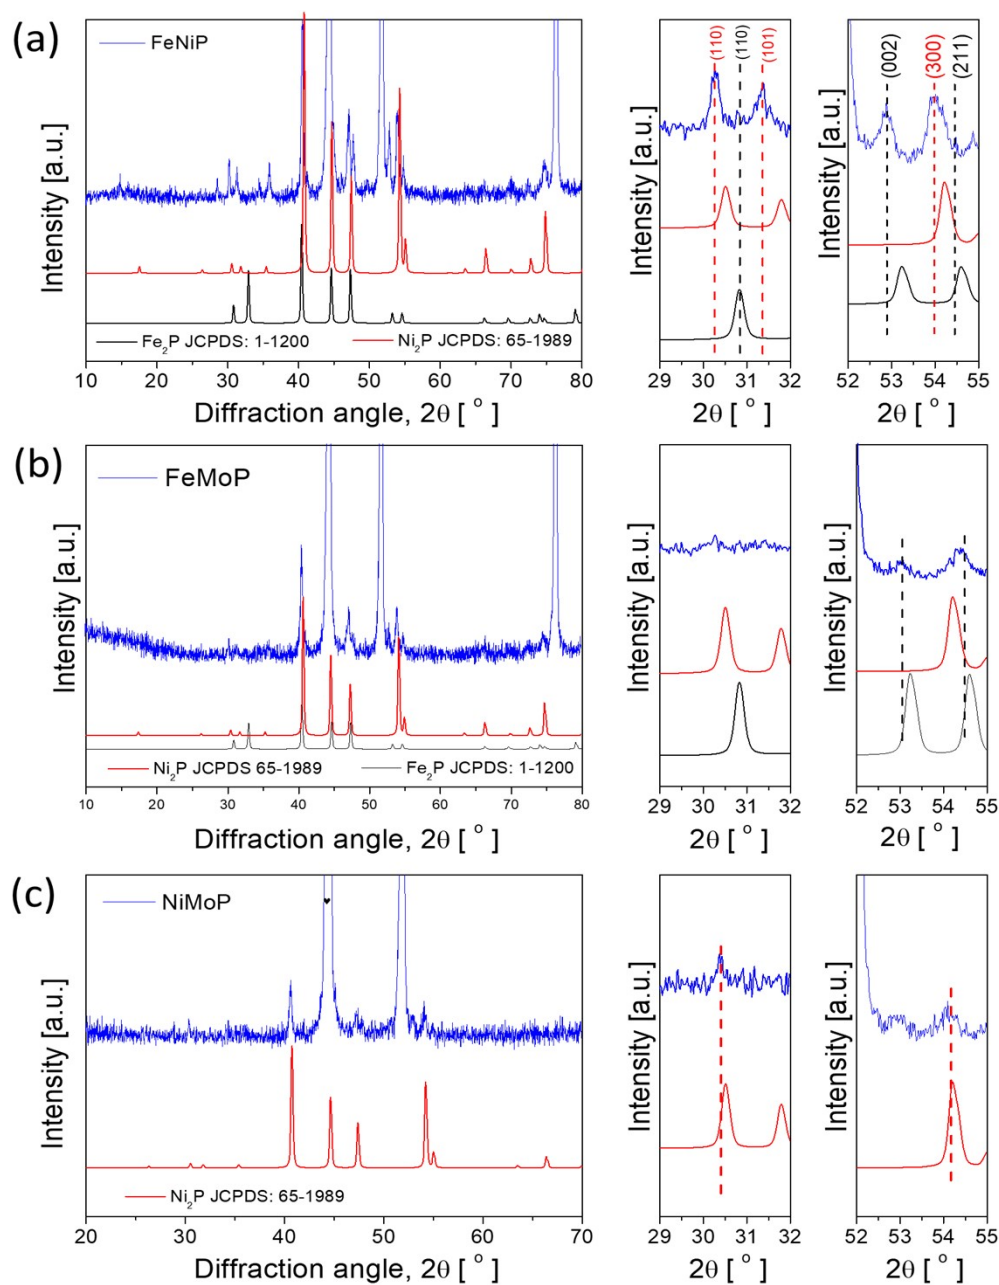

**Fig. S1** XRD patterns of (a) FeNiP, (b) FeMoP and (c) NiMoP.

**Table S1** The values showing the difference between the peak position angles of as-prepared samples and the corresponding reference diffraction angles for various

| Sample  | (110)             | (110)             | (101)             | (002)             | (300)             | (211)             |
|---------|-------------------|-------------------|-------------------|-------------------|-------------------|-------------------|
|         | Ni <sub>2</sub> P | Fe <sub>2</sub> P | Ni <sub>2</sub> P | Fe <sub>2</sub> P | Ni <sub>2</sub> P | Fe <sub>2</sub> P |
| FeNiMoP | 0.21°             | 0°                | 0.37°             | 0.27°             | 0.21°             | 0.28°             |
| FeNiP   | 0.24°             | –                 | 0.40°             | 0.32°             | 0.21°             | 0.14°             |
| FeMoP   | –                 | –                 | –                 | 0.16°             | –                 | 0.10°             |
| NiMoP   | 0.08°             | –                 | –                 | –                 | 0.08°             | –                 |

diffraction planes.

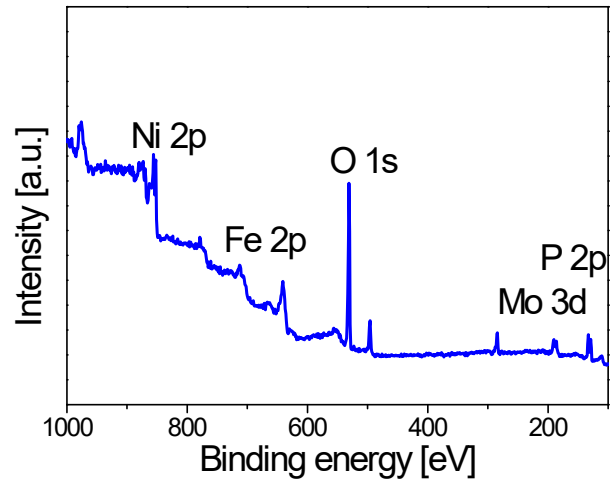

**Fig. S2** XPS survey spectrum of as-prepared FeNiMoP.

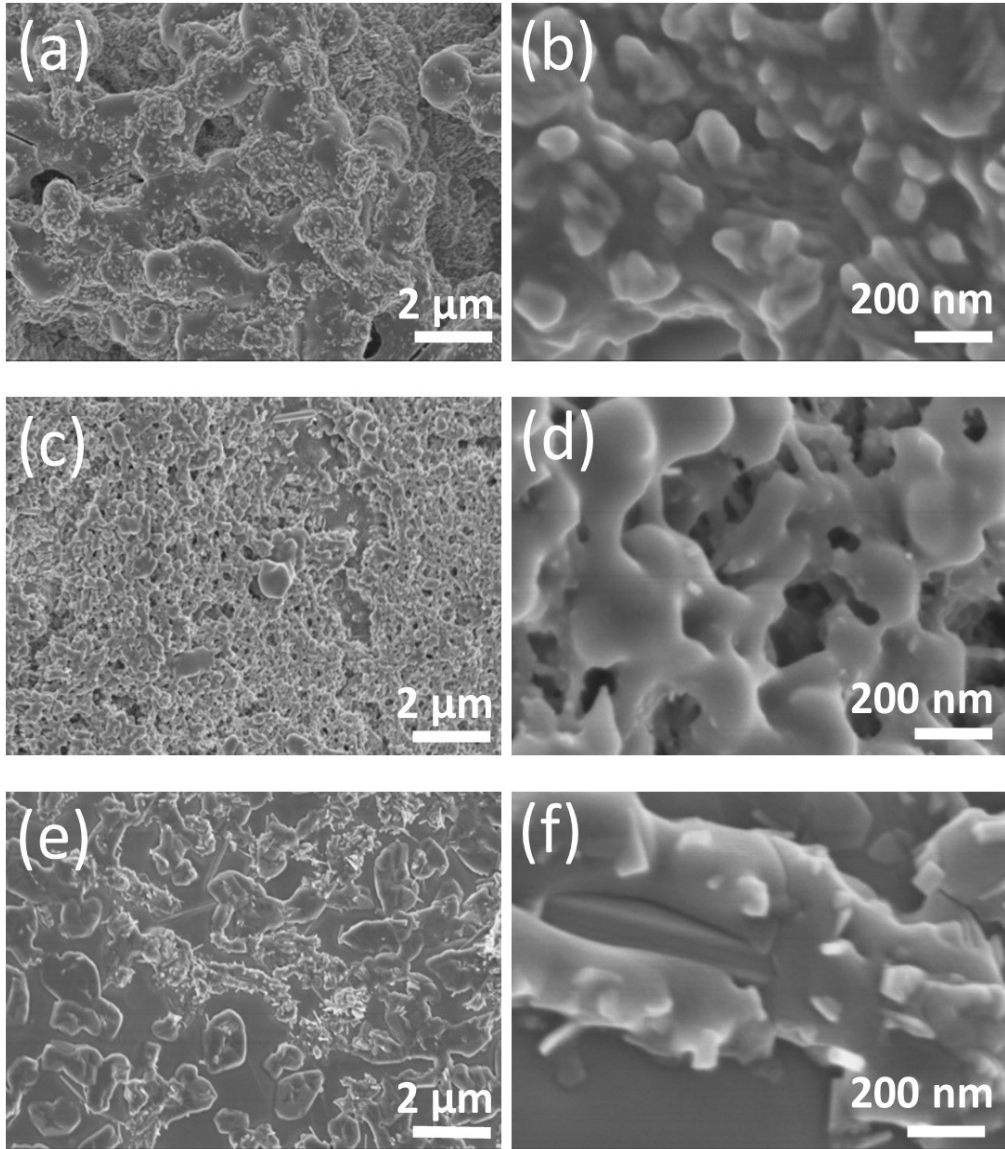

**Fig. S3** SEM images of (a-b) FeNiP, (c-d) FeMoP and (e-f) NiMoP.

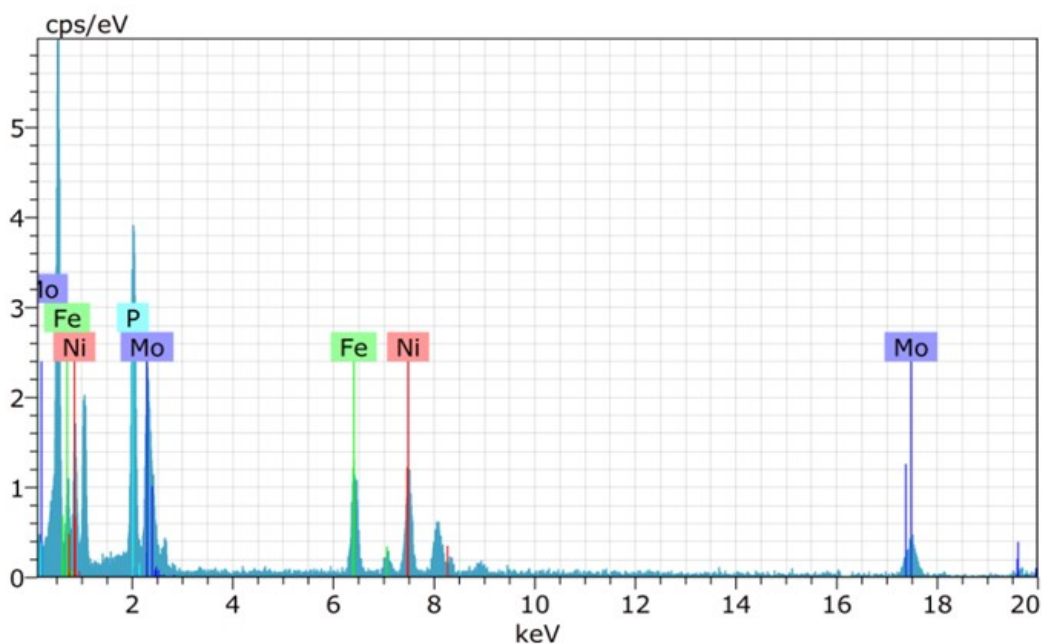

Spectrum: 1

| Element    | Series   | unn. C<br>[wt.%] | norm. C<br>[wt.%] | Atom. C<br>[at.%] | Error (3 Sigma)<br>[wt.%] |
|------------|----------|------------------|-------------------|-------------------|---------------------------|
| Nickel     | K-series | 16.88            | 16.88             | 15.65             | 2.15                      |
| Iron       | K-series | 15.92            | 15.92             | 15.50             | 2.01                      |
| Molybdenum | L-series | 41.35            | 41.35             | 23.45             | 12.78                     |
| Phosphorus | K-series | 25.85            | 25.85             | 45.40             | 2.82                      |
| Total:     |          | 100.00           | 100.00            | 100.00            |                           |

**Fig. S4** EDS profile and corresponding elemental composition of Ni, Fe, Mo, and P from as-prepared FeNiMoP.



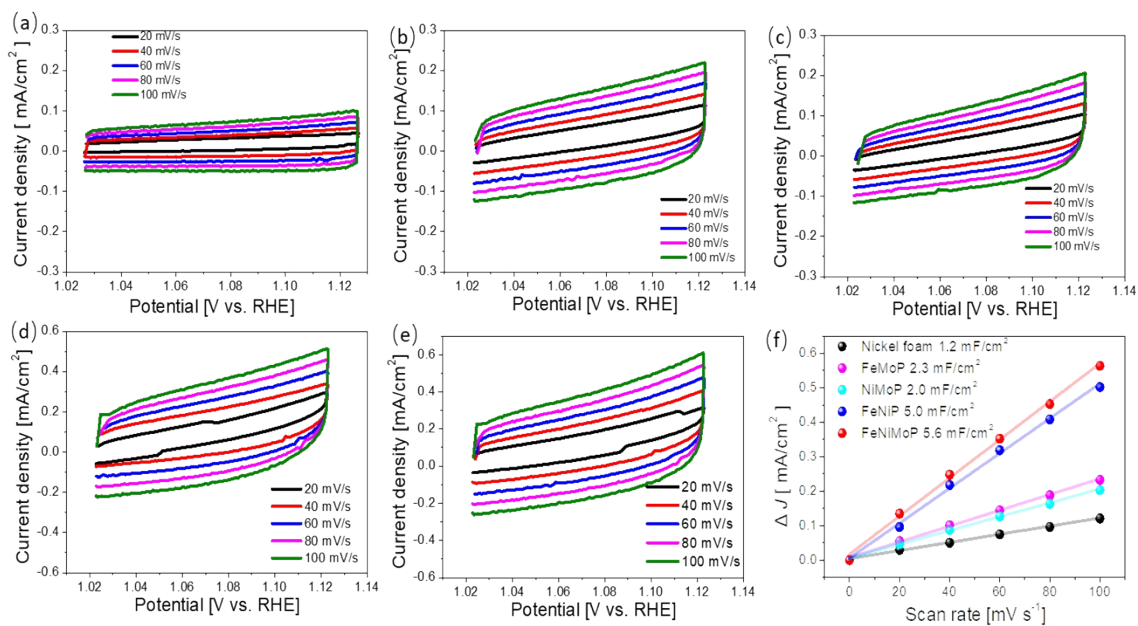

**Fig. S5** (a) Cyclic voltammograms of (a) NF, (b) FeMoP, (c) NiMoP, (d) FeNiP and (e) FeNiMoP at the scan rates from 20 to 100 mV s<sup>-1</sup> with a 20 mV s<sup>-1</sup> interval in the potential range from 1.024 V to 1.124 V vs RHE. (f) Plots showing the dependence of current density on the scan rate for the extraction of double-layer capacitance ( $C_{dl}$ ) performed on NF, FeMoP, NiMoP, FeNiP and FeNiMoP.

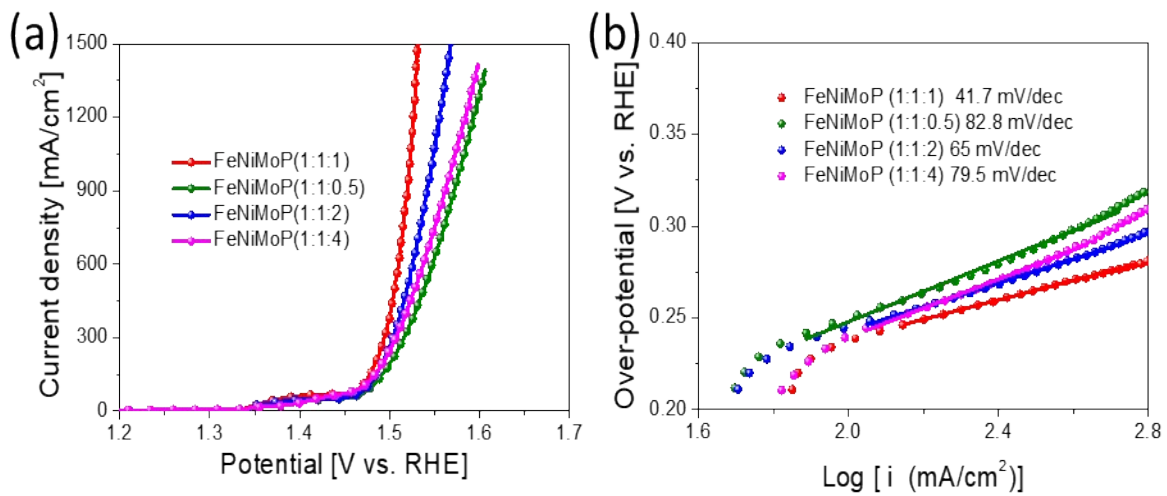

**Fig. S6** (a) OER polarization curves and (b) the corresponding Tafel slopes of FeNiMoP catalysts with different MoP mole ratios performed in 1.0 M KOH electrolyte.

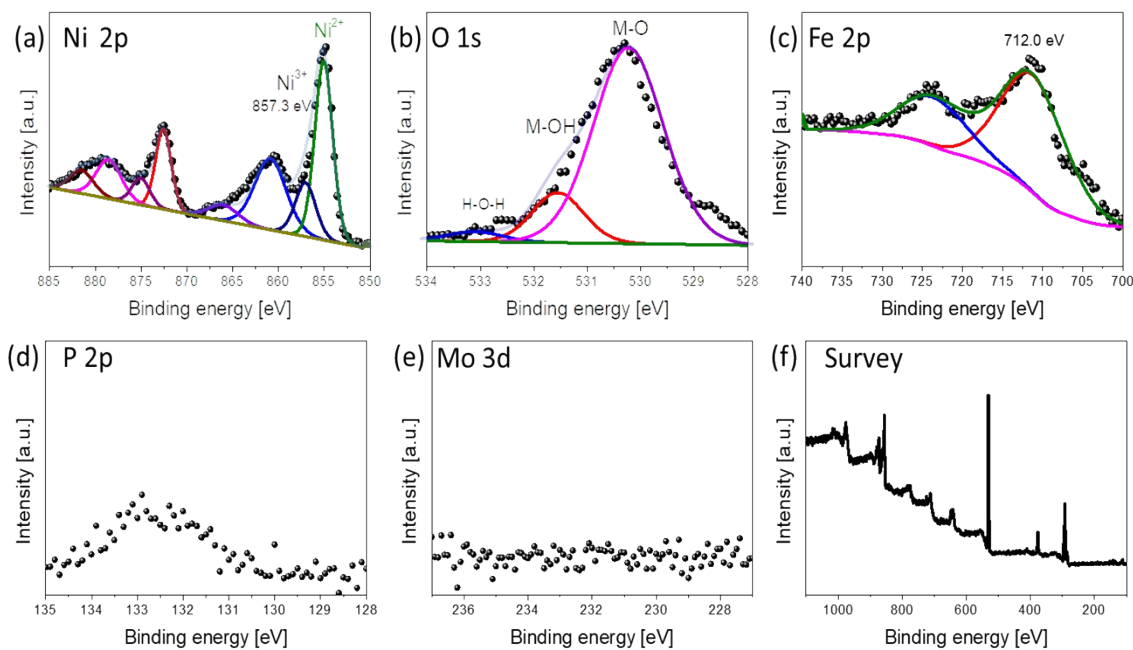

**Fig. S7** High-resolved XPS spectra of (a) Ni 2p, (b) O1s, (c) Fe 2p, (d) P 2p, and (e) Mo 3d of FeNiMoP after long-term OER stability test in Fig. 3b. (f) Corresponding XPS survey of FeNiMoP after the stability test.

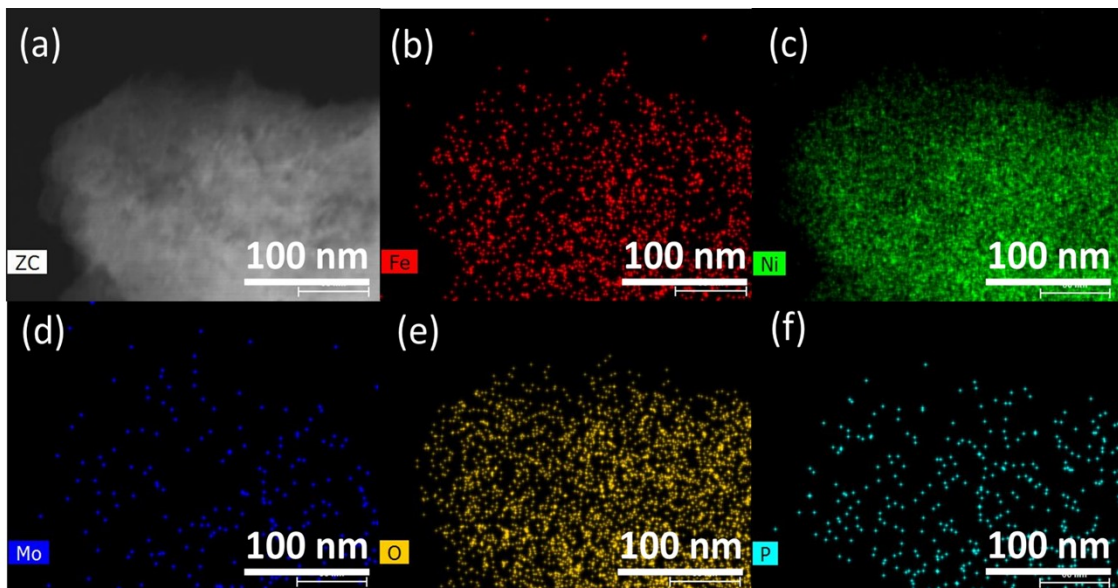

(g)

Spectrum: 1

| Element    | Series   | unn. C<br>[wt.%] | norm. C<br>[wt.%] | Atom. C<br>[at.%] | Error (3 Sigma)<br>[wt.%] |
|------------|----------|------------------|-------------------|-------------------|---------------------------|
| Iron       | K-series | 3.79             | 3.79              | 2.94              | 1.11                      |
| Nickel     | K-series | 82.74            | 82.74             | 61.09             | 8.92                      |
| Molybdenum | L-series | 0.00             | 0.00              | 0.00              | 0.00                      |
| Phosphorus | K-series | 0.38             | 0.38              | 0.54              | 0.35                      |
| Oxygen     | K-series | 13.08            | 13.08             | 35.43             | 2.50                      |
| Total:     |          | 100.00           | 100.00            | 100.00            |                           |

**Fig. S8** STEM images of FeNiMoP after long-term OER stability test in Fig. 3b and corresponding element mapping images of (b) Fe, (c) Ni, (d) Mo, (e) O, and (f) P elements. (g) Summary of elemental composition based on the EDS-mapping.

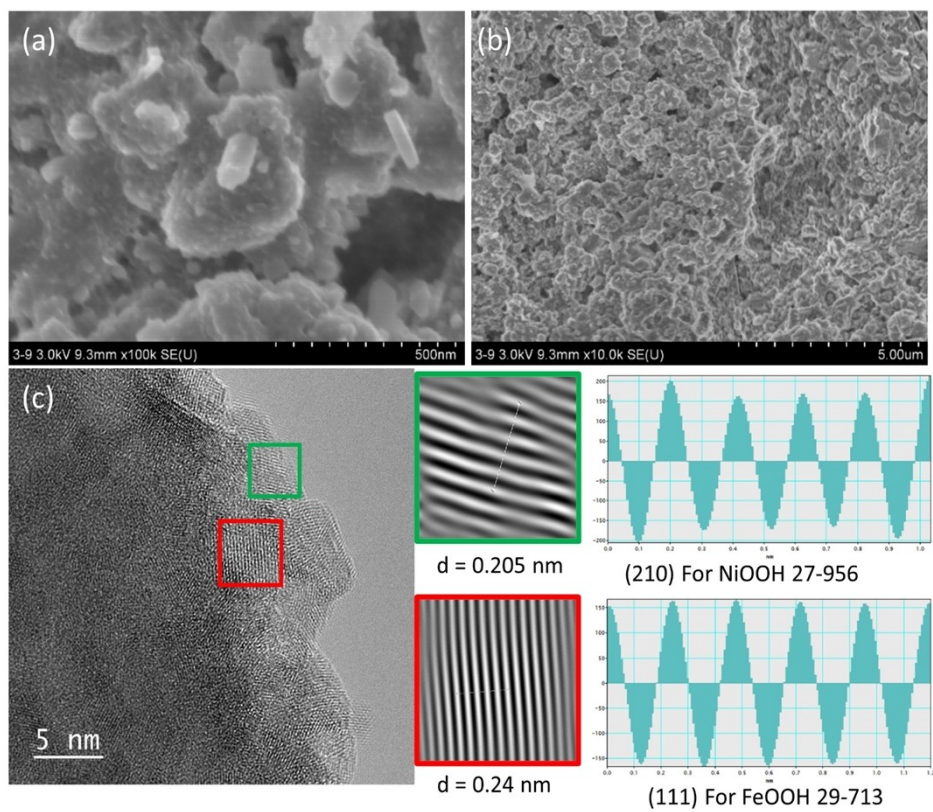

**Fig. S9** (a) and (b) SEM images at different magnification and (c) corresponding HR-TEM image of FeNiMoP after long-term OER test in Fig. 3b.

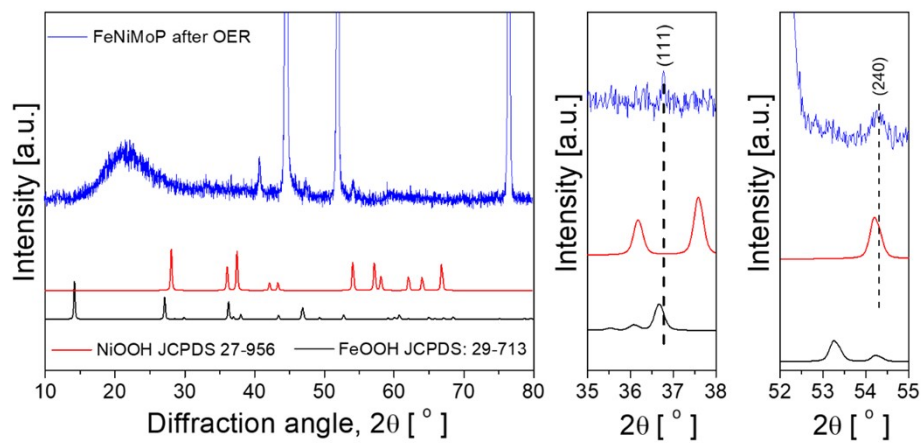

**Fig. S10** XRD patterns of FeNiMoP after OER stability test in Fig. 3b.

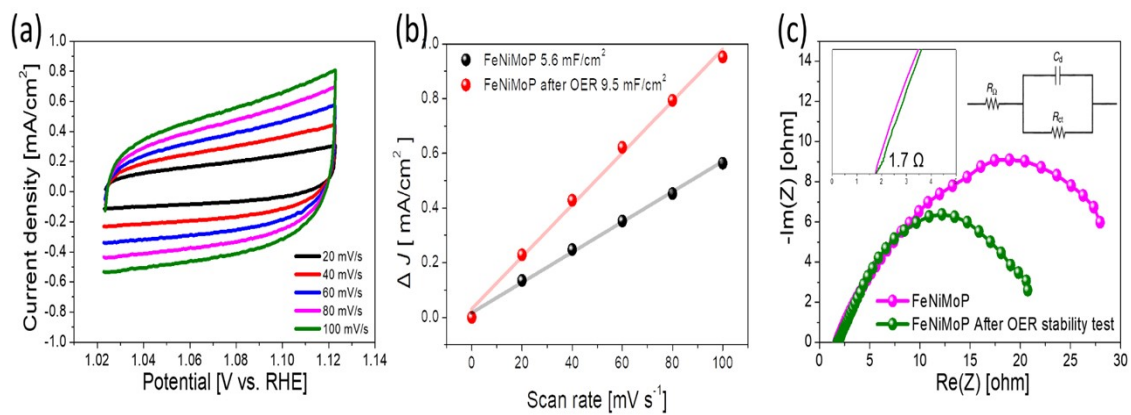

**Fig. S11** (a) Cyclic voltammetry curves of FeNiMoP after long-term OER stability test in Fig. 3b at different rates from 20 to 100 mV s<sup>-1</sup> with a 20 mV s<sup>-1</sup> interval in the potential range from 1.024 V to 1.124 V vs RHE. (b) Capacitive  $\Delta J$  ( $= J_a - J_c$ ) versus the scan rates and (c) Nyquist plots of FeNiMoP before and after the stability test.

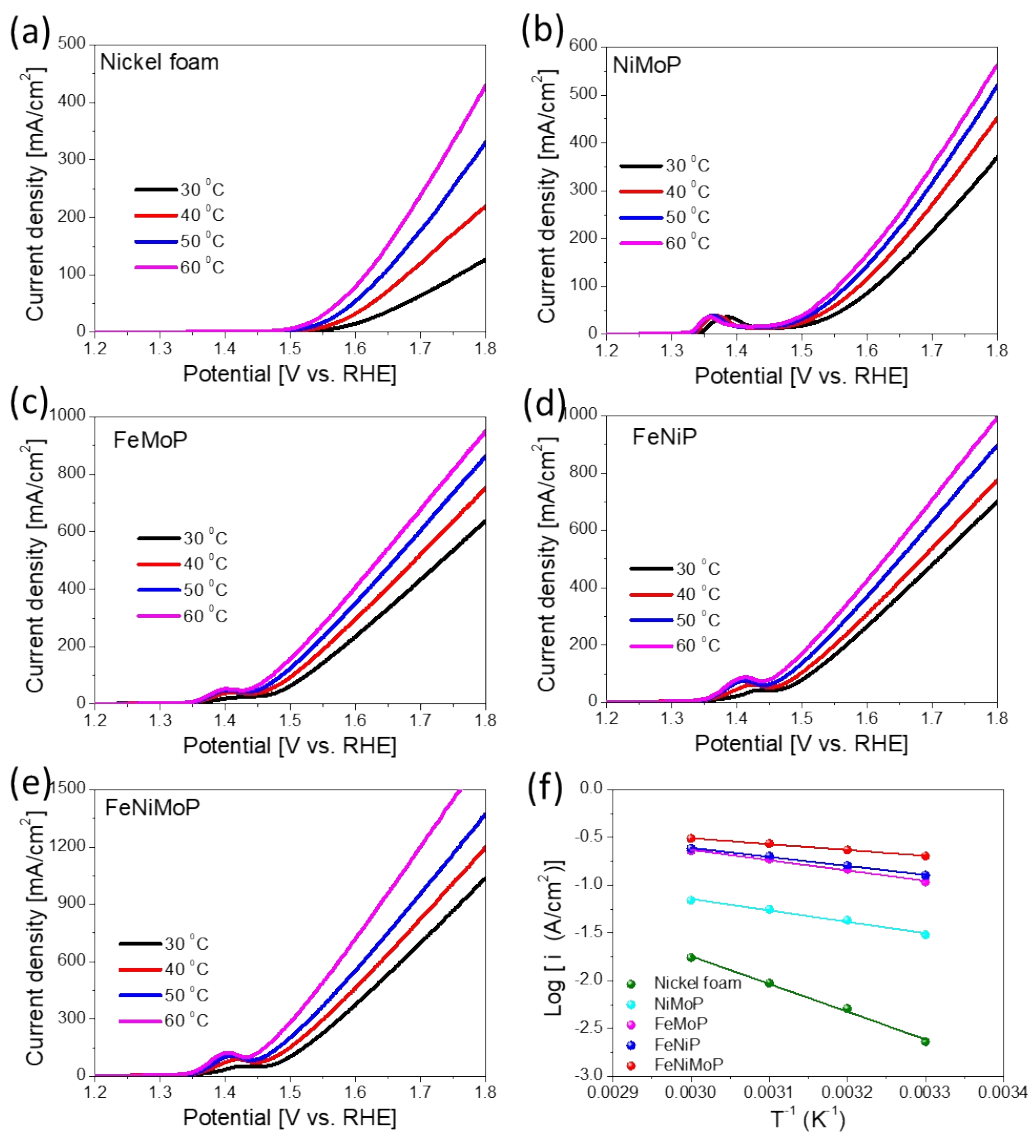

**Fig. S12** OER polarization curves tested at different temperature (without IR correction) for (a) bare nickel foam, (b) NiMoP, (c) FeMoP, (d) FeNiP, and (e) FeNiMoP in 1.0 M KOH with the scan rate of 2.0 mV s<sup>-1</sup> at 30 °C, 40 °C, 50 °C, 60 °C, respectively. (f) Arrhenius plots of the current density at the overpotential of 300 mV without iR correction



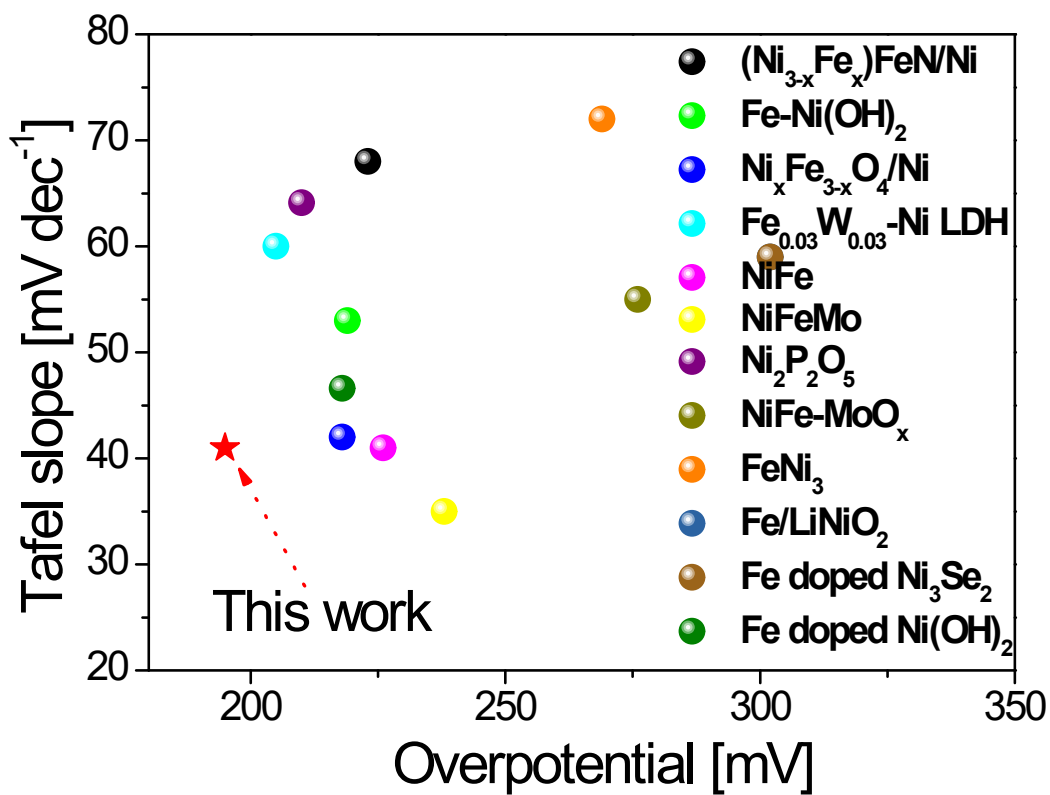

**Fig. S13** Comparison with recently reported FeNi-based OER electrocatalyst references:  $(\text{Ni}_{3-x}\text{Fe}_x)\text{FeN}/\text{Ni}$ ,<sup>1</sup>  $\text{Fe-Ni}(\text{OH})_2$ ,<sup>2</sup>  $\text{Ni}_x\text{Fe}_{3-x}\text{O}_4/\text{Ni}$ ,<sup>3</sup>  $\text{Fe}_{0.03}\text{W}_{0.03}\text{-Ni}$ ,<sup>4</sup>  $\text{NiFe}$  alloy,<sup>5</sup>  $\text{NiFeMo}$ ,<sup>6</sup>  $\text{Ni}_2\text{P}_2\text{O}_7$ ,<sup>7</sup>  $\text{NiFe-MoO}_x$ ,<sup>8</sup>  $\text{FeNi}_3$ ,<sup>9</sup>  $\text{Fe}/\text{LiNiO}_2$ ,<sup>10</sup>  $\text{Fe-doped Ni}_3\text{Se}_2$ ,<sup>11</sup>  $\text{Fe-doped } \beta\text{-Ni}(\text{OH})_2$ .<sup>12</sup>

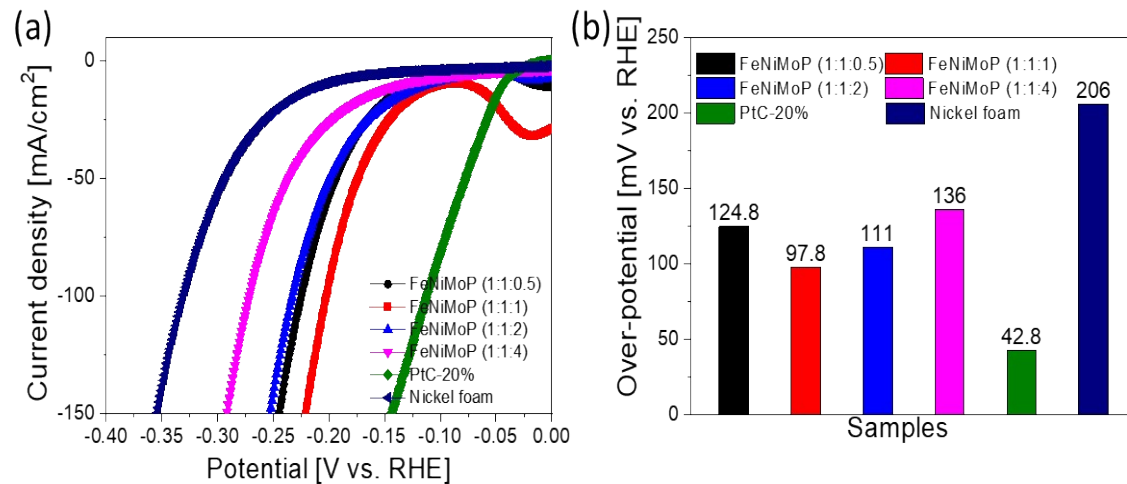

**Fig. S14** (a) HER polarization curves and (b) their corresponding overpotentials at 10 mA/cm<sup>2</sup> of FeNiMoP catalysts with different mole ratios of MoP.

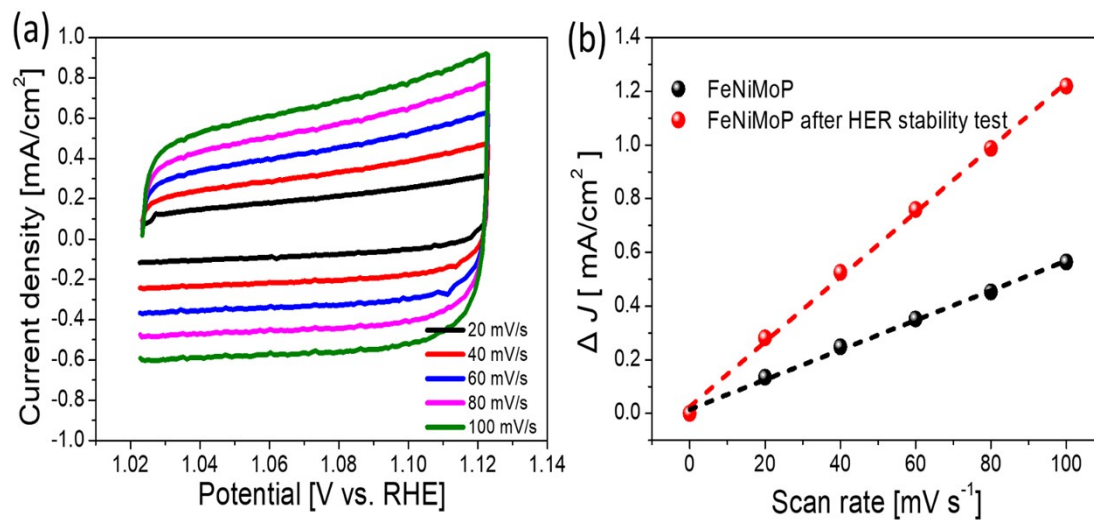

**Fig. S15** (a) Cyclic voltammetry curves of FeNiMoP after HER stability test in Fig. 4c at different rates from 20 to 100 mV s<sup>-1</sup> with a 20 mV s<sup>-1</sup> interval in the potential range from 1.024 V to 1.124 V vs RHE. (b) Capacitive  $\Delta J$  ( $= J_a - J_c$ ) versus the scan rates of FeNiMoP before and after the HER stability test.

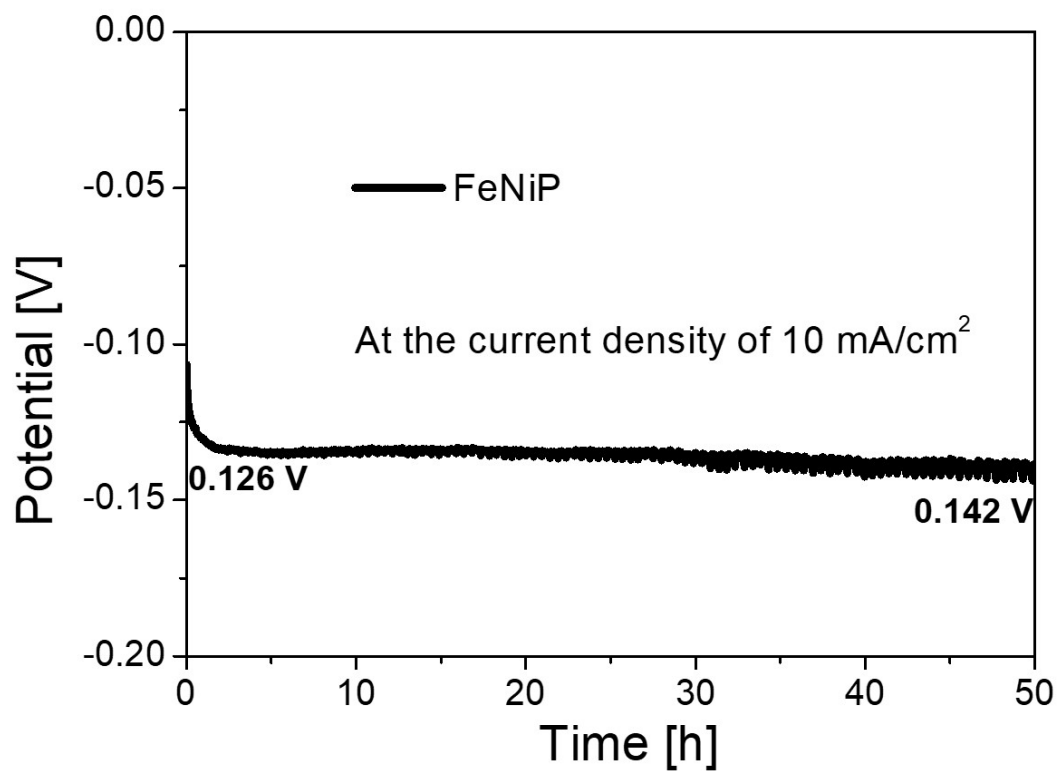

**Fig. S16** HER long-term stability test of FeNiP at the current density of 10 mA cm<sup>-2</sup>.

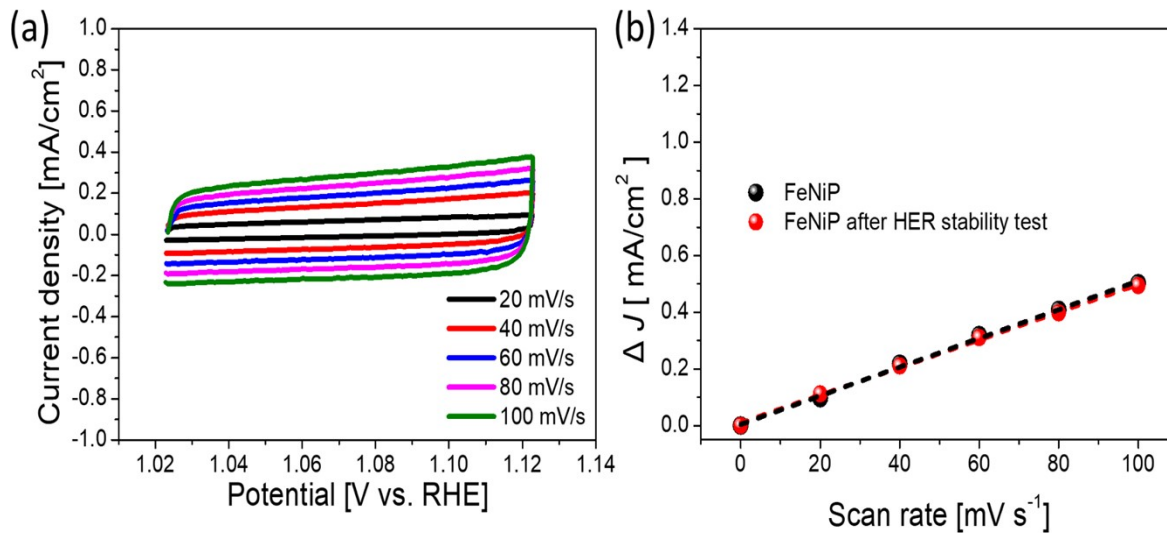

**Fig. S17** (a) Cyclic voltammetry curves of FeNiP after HER stability test in Fig. S16 at different rates from 20 to 100 mV s<sup>-1</sup> with a 20 mV s<sup>-1</sup> interval in the potential range from 1.024 V to 1.124 V vs RHE. (b) Capacitive  $\Delta J$  ( $= J_a - J_c$ ) versus the scan rates of FeNiP before and after the HER stability test.

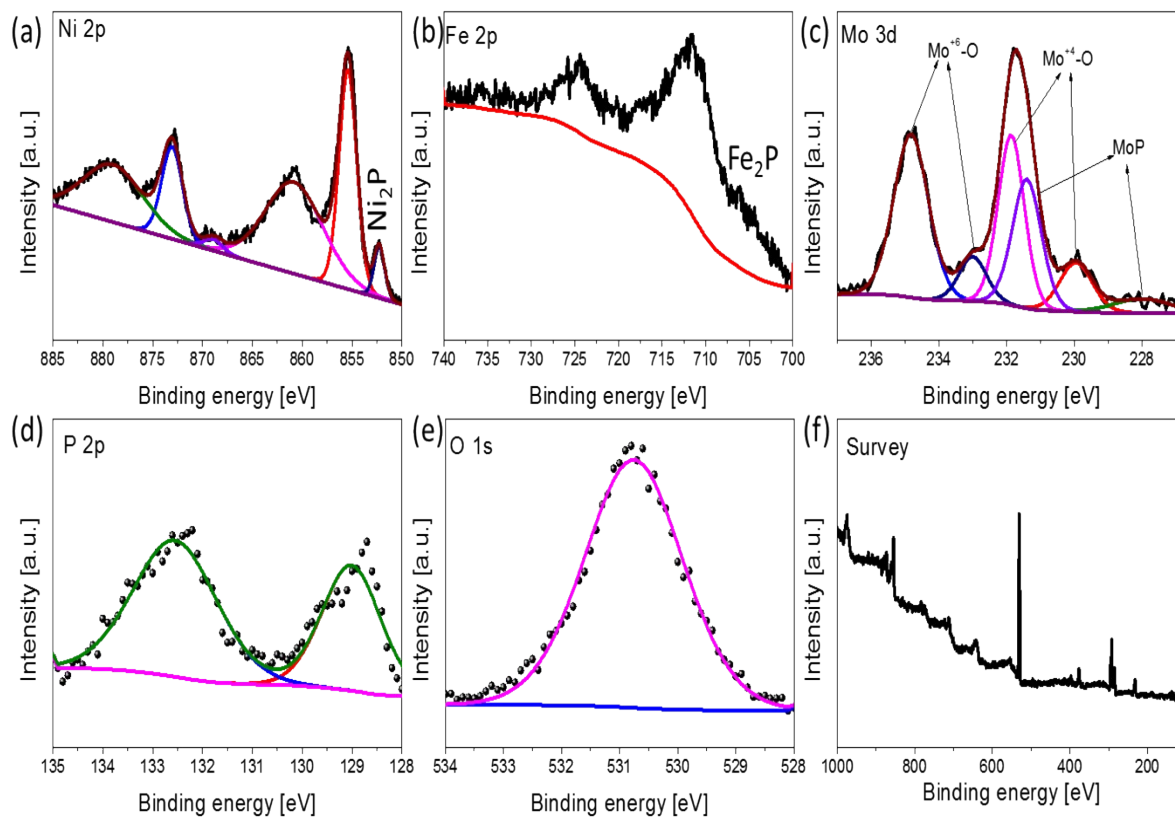

**Fig. S18** XPS profiles of FeNiMoP after long-term HER stability test in Fig. 4c, (a) Ni 2p, (b) Fe 2p, (c) Mo 3d, (d) P 2p, (e) O 1s and (f) corresponding survey scan.

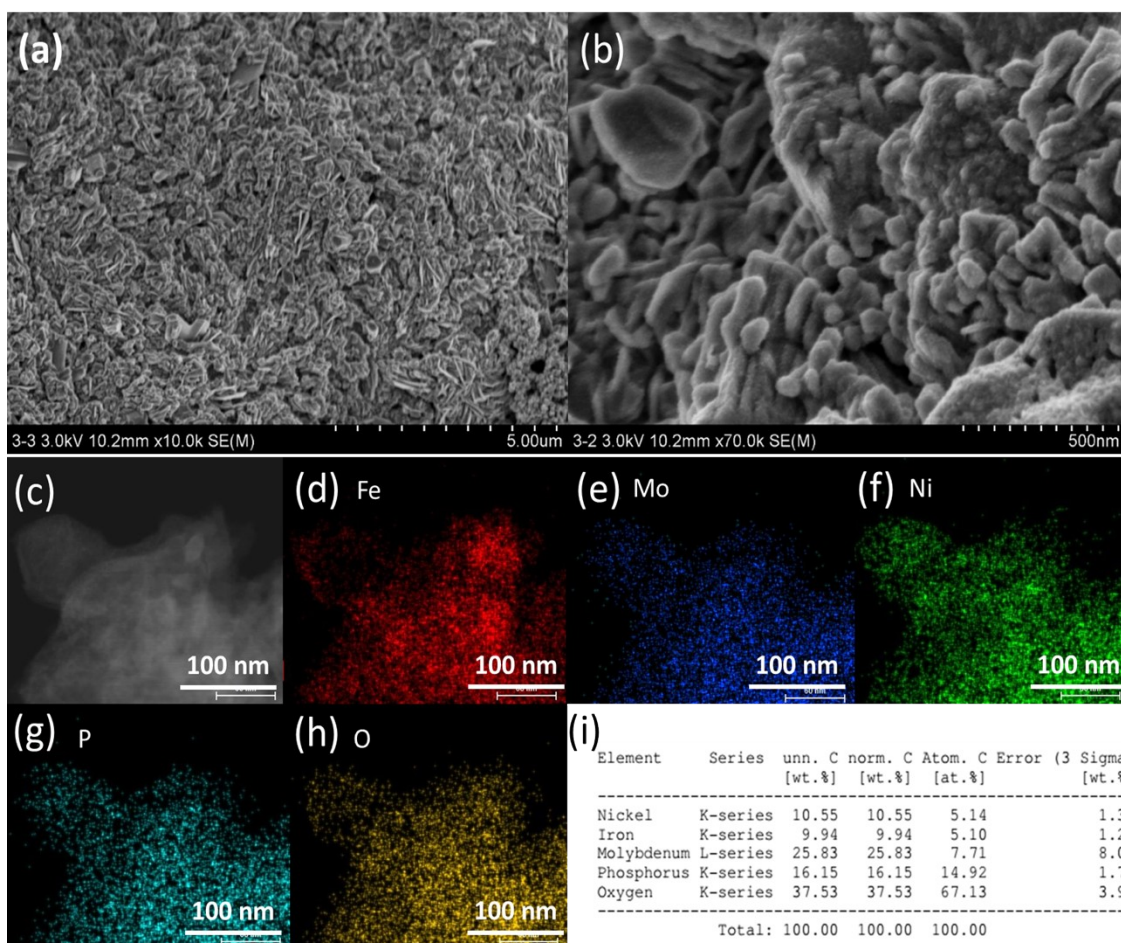

**Fig. S19** (a) and (b) SEM images, (c) STEM image and corresponding element mapping images of (d) Fe, (e) Mo, (f) Ni, (g) P, (h) O, and (i) summary of the elemental composition of FeNiMoP after HER stability test in Fig. 4c.

## REFERENCES

- 1 M. Yan, K. Mao, P. Cui, C. Chen, J. Zhao, X. Wang, L. Yang, H. Yang, Q. Wu and Z. Hu, *Nano Res.*, 2020, **13**, 328–334.
- 2 T. Kou, S. Wang, J. L. Hauser, M. Chen, S. R. J. Oliver, Y. Ye, J. Guo and Y. Li, *ACS Energy Lett.*, 2019, **4**, 622–628.
- 3 D. Li, S. Liu, G. Ye, W. Zhu, K. Zhao, M. Luo and Z. He, *Green Chem.*, 2020, **22**, 1710–1719.
- 4 C. Li, P. Tian, H. Pang, W. Gong, J. Ye and G. Ning, *Sustain. Energy Fuels*, 2020, **4**, 2792–2799.
- 5 C. Wang, H. Yang, Y. Zhang and Q. Wang, *Angew. Chemie Int. Ed.*, 2019, **58**, 6099–6103.
- 6 F. Qin, Z. Zhao, M. K. Alam, Y. Ni, F. Robles-Hernandez, L. Yu, S. Chen, Z. Ren, Z. Wang and J. Bao, *ACS Energy Lett.*, 2018, **3**, 546–554.
- 7 S. Surendran, A. Sivanantham, S. Shanmugam, U. Sim and R. Kalai Selvan, *Sustain. Energy Fuels*, 2019, **3**, 2435–2446.
- 8 C. Xie, Y. Wang, K. Hu, L. Tao, X. Huang, J. Huo and S. Wang, *J. Mater. Chem. A*, 2017, **5**, 87–91.
- 9 J. Ding, Q. Sun, L. Zhong, X. Wang, L. Chai, Q. Li, T. T. Li, Y. Hu, J. Qian and S. Huang, *Electrochim. Acta*, 2020, **354**, 136716.
- 10 K. Zhu, T. Wu, Y. Zhu, X. Li, M. Li, R. Lu, J. Wang, X. Zhu and W. Yang, *ACS Energy Lett.*, 2017, **2**, 1654–1660.
- 11 M. Ghaemmaghami, Y. Yamini, E. Saievar-Iranizad and A. Bayat, *Sustain. Energy Fuels*, 2020, **4**, 1150–1156.
- 12 X. Qiao, H. Kang, Y. Li, K. Cui, X. Jia, H. Liu, W. Qin, M. Pupucevski and G. Wu, *ACS Appl. Mater. Interfaces*, 2020, **12**, 36208–36219.
